# Supplementary material for: Assessing the danger of self-sustained HIV epidemics in heterosexuals by population based phylogenetic cluster analysis
Source: eLife journal article supplement (doi:10.7554/elife.28721), 2017-09-08
Supplement: supp [file elife-28721-supp-v1.zip]

Archive with 4 entries (4 files):
- elife_poa_e28721_Transparent_Reporting_File.pdf
- elife_poa_e28721_Source_Data_File_Figure_3.csv
- elife_poa_e28721_Source_Data_File_Figure_1.csv
- elife_poa_e28721_Source_Data_File_Figure_2.csv
