# Supplementary material for: Assessing the danger of self-sustained HIV epidemics in heterosexuals by population based phylogenetic cluster analysis
Source: eLife journal article supplement (doi:10.7554/elife.28721), 2017-09-08
Supplement: supp [file elife-28721-supp-v1.zip › elife_poa_e28721_Source_Data_File_Figure_1.csv]

Subtype	Estimate	2.5%	97.5%
Overall	0.439008098645219	0.41634736921613	0.462902193999557
B	0.354656279490874	0.325953061931821	0.385887083977197
C	0.487123227275317	0.415200417480026	0.571504816857598
01_AE	0.437965565445249	0.354828439738947	0.540581912365586
02_AG	0.617017948087434	0.555761685935697	0.685025898503692
A	0.538974472914789	0.471750392082126	0.615777935385803
other	0.546308741631822	0.468539338559663	0.636986516651558
