# Supplementary material for: Assessing the danger of self-sustained HIV epidemics in heterosexuals by population based phylogenetic cluster analysis
Source: eLife journal article supplement (doi:10.7554/elife.28721), 2017-09-08
Supplement: supp [file elife-28721-supp-v1.zip › elife_poa_e28721_Source_Data_File_Figure_2.csv]

Subtype	R0 estimate on 1.1.1996	R0 2.5%	R0 97.5%	Exp(time rate per 10 years)	Time rate 2.5%	Time rate 97.5%
B	0.342996554545422	0.311987259926325	0.377087950507377	0.894294574847979	0.791710458415915	1.01017079931308
C	0.500597779531471	0.427007943502722	0.586869965032026	0.811708510930274	0.627248030578213	1.05041494687401
01_AE	0.457980940968673	0.371031699873597	0.565306259174102	0.77491624940351	0.539870304129279	1.11229528462045
02_AG	0.647934038056666	0.583114249780025	0.719959283846673	0.660171435163451	0.54390511519828	0.801291092191495
A	0.484498884799466	0.409931864077835	0.572629722014864	0.65080297902895	0.516799942843883	0.819552175610247
other	0.548906095527902	0.47055381625632	0.640304873318811	0.850363096094614	0.672130982307457	1.0758578524637
