# Supplementary material for: Assessing the danger of self-sustained HIV epidemics in heterosexuals by population based phylogenetic cluster analysis
Source: eLife journal article supplement (doi:10.7554/elife.28721), 2017-09-08
Supplement: supp [file elife-28721-supp-v1.zip › elife_poa_e28721_Source_Data_File_Figure_3.csv]

Factor	Effect estimate (exp)	2.5%	97.5%	p-value (two-sided)
Reference R0	0.28607343336317	0.255116864315103	0.320786356072139	0
Subtype C	1.42245105813434	1.18168004910993	1.71227991393404	0.000195837557777967
Subtype 01_AE	1.31514499538081	1.04684442613255	1.65220955062541	0.0186116376225347
Subtype 02_AG	1.7762950023418	1.53361322735484	2.05737918731084	1.77635683940025e-14
Subtype A	1.53663239938251	1.31184092112927	1.79994318884293	1.01744123348624e-07
Subtype other	1.53172959258467	1.2796010780716	1.83353670531084	3.37117548676602e-06
Establishment date	0.807252639883732	0.740148878679092	0.880440197061752	1.32701423138926e-06
Age at infection	1.00674053109618	0.955971511018593	1.06020575432411	0.799142912283061
Earliest CD4 cell count	1.00023438425446	0.98180686163478	1.01900777285162	0.980292807641383
Frequency of reporting sex with occasional partner	1.25822251853838	1.09955518846511	1.43978576315662	0.000837989594853594
Time to diagnosis	1.42056289552273	1.23361234837261	1.6358452821894	1.08194471071243e-06
